# Supplementary material
Source: MDPI journal article supplement (https://www.mdpi.com/2075-4426/11/6/448)
Supplement: s1 [file s1]

Archive with 1 entries (1 files):
- jpm-1197421 Supplementary Figures.pdf
